# Supplementary material for: RNAi phenotypes are influenced by the genetic background of the injected strain
Source: PubMed Central journal article supplement (PMC3574008; doi:10.1186/1471-2164-14-5), 2013-01-16
Supplement: 1471-2164-14-5-S1.pdf [file 1471-2164-14-5-S1.pdf]

## Additional file 1

Kitzmann et al.

### A) Genomic structure of *Tc-importin α1* (*Tc000963*) and location of the dsRNA fragments

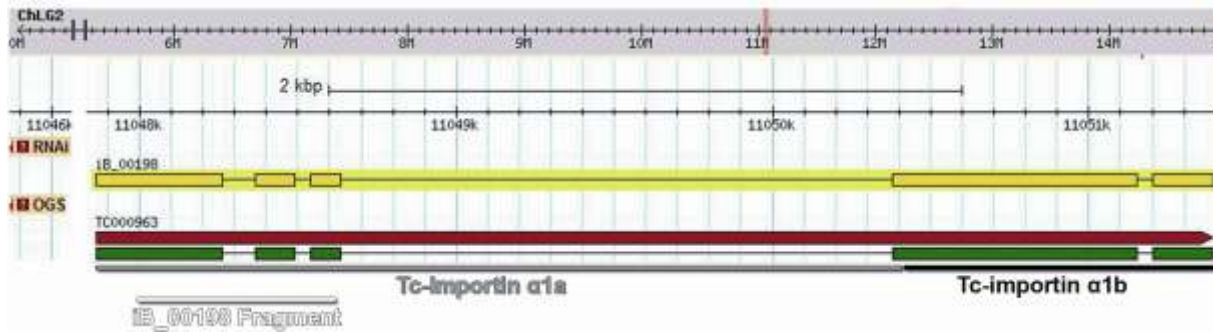

*TC000963* (NCBI LOC656915) is located on linkage group 2. The *iB\_00198* dsRNA targets the first three exons (white bar). The *Tc-importin α1a* dsRNA fragment targets in addition also a part of the fourth exon sequence (grey bar) and the *Tc-importin α1b* dsRNA fragment targets the fourth and fifth exon (black bar).

### B) *Tc000963* open reading frame and dsRNA fragments used in RNAi experiments

The *iB\_00198* fragment is underlined, the non-overlapping dsRNA fragments *Tc-importin α1a* and *-importin α1b* are highlighted in italic and regular fonts, respectively.

```
ATGTCGGGCTCCGCTCACAAACACCGCTACAAAACGCGGCGCTGGACAGCGTCGAGTTGCGACGGC
GGCGAGAGGAAGAAGGCCTCCAGTTAAGGAAACAGAAACGGGAACAGCAGCTGAACAAGCGGCGG
AATGTTAACGTCAACCAATTGGCCGAGGACAATGACCATCTGCAAGTGGACAGCGAGATCCTCTCGC
CTGTCTCGCCCATGATCACCCCGAAATGGTCCAGGCGTTGTACAGCCCCGACGTGGAGCAGCAAATC
AGCGCCACGCAAAAATTCAGACAACCTGCTGAGCTACGAACCCAACCCACCCATTGATGAGGTGGTCC
AGACCGGGATCATCCACGATTTGTAGAGTTTTTGCAGAAATTCAAACAATTGTAGCCTTCAGTTTGAA
GCAGCATGGGCTTTGACCAACGTTGCCTCTGGTACCTCTCAGCAAACCAGGATGGTCATTGAAGCTG
GTGCTGTTCTATTTTATACGTTTGTGAGCAGTCAATATGAGGATGTTGAGGAGCAAGCTGTTTGG
GCATTAGGGAATATAGCAGGGGATCACCCGAATGTAGAGATCACGTCCTGGATTGCGGGTATTTTGG
TTCCACTCTTACAACCTCTTAGTAAATCGACGCGTTTATCGATGACTCGCAATGCCGTGTGGGCGCTTT
CGAACCTCTGCAGGGGCAAGAACCCTCCTCCAGACTTTGCGAAAGTCTCCCAGCTCTGCCCGTACTC
GCTCGTCTTGTTCCTCCGACCCTGACGTGCTCTCTGACACTTGCTGGGCCTTGAGCTACCTATCC
GACGGTCCTAACGAAAAAATCCAGGCGGTCATAGACGCCGGCGTTTGTTCGGAAACTGGTCGAATTG
CTAATGCACCAACAGCCCAACGTAGTCTCGGCAGCTCTGCGCGCTGTTCGGCAACATAGTACTGGTG
ACGACGTCCAAACTCAGGTCATACTAACTGCTCCGCTCTACATTGCTTGCACCACTTGTGTCATCCT
CGAAGGAGTCCGTGAGGAAGGAGGCGTGTGGACGATCAGCAACATCACGGCTGGAACCGGCAG
CAAATCCAGGCGGTCATAGACGCGAACATTTTCCCGTTTTGATAGAGATTTTGTAGCAAGGCGGAGT
```

TTAAGACGCGGAAGGAGGCGGCCTGGGCTATCACGAATGCCACCAGCGGGGGCACACCCGACCAG  
ATCAGGTATCTAGTGAACCAGGCTTGCATTGGGCCGCTTTGTGACCTTTTGACCGTCATGGACGCGA  
AAATCGTGCAAGTGGCCCTCAACGGCCTGGAGAATATTCTGAGATTAGGGGAGCAAGACGCCAAGA  
ATCACTCGGGGACCAACCCGTATGCTGTGCTAATCGAGCAGTGCTATGGGTTGGATAAAATCGAATT  
TTTGCAATCGCATGTCAATATGGAGATTTATCAGAAGGCCTTCGACATTATTGAACACTTCTTCGGGA  
CGGAGGAGGAGGACACGACTGTGGCGCCCTCGGTGAATCCCGACCAACAGCAGTACCATTTCAGCT  
CGGATCAGTCGGTGCCGATGGGAGGATTCCATTTTAA

### C) Fasta sequences of the aligned amino acid sequences of Importin $\alpha$ 1 orthologs

>*D.m.*/Importin  $\alpha$ 1

MSA-

HKKNAALDSTEMRRRREEVGIQLRKNKREQQLFKRRNVVLEPNEQQAADMHMADSNEEMIQMLFSGRENEQLEATQKFRKLLSRDPNPIE  
EVIQKGIVPQFVTFRLNSANATLQFEAAWTLTNIASGTSQQTKVIEAGAVPIFIDLLSSPHDDVQEAVWALGNIAGDSPMCRDHLGSGILE  
PLLHVLSNSDRITMIRNAVWTLNLCRKGKSPADFAKISHGLPILARLLKYTDADVLSBTCWAIGYLSGPNDKIQAVIDAGVCRRLVELLHPQ  
QNVSTAALRAVGNIVTGGDDQQTQVILGYNALTCSHLLHSTAETIKKESCWTISNIAAGNREIQALINANIFPQLMVIMQTAEFKTRKEAAWAI  
TNATSSGTHEQIHYLVQVGCVPPMCDFTLVVDSDIVQVALNALENILKAGEKFQTPYAITIEECGLDKIEYLQAHENRDIYHKSFYIIEQYFGE  
DSRVAPVAG--TQQFEFDPDN-MPSTGFNF

>*D.m.*/Importin  $\alpha$ 2

MSKDSNKANSINTQDSRMRRHEVTIELRKSCKEDQMFKRRNIN-

DEPLKELNGQSPVQLVDEIVAAMNSEQERQFLGMSARKMLSRERNPPIDLMIGHGIVPICIRFLOQNTNNSMLQFEAAWALTNIASGTSQQ  
TRCVIEHNAVPHFVALLQSKSMNLAEQAVWALGNIAGDGAAARDIVIHNVIDGILPLINNETPLSFLRNIVWLSNLCRNKNPSPPFQVKRL  
LPVLSQLLSQDIQVLADACWALSYYTDDNTKIQAVVDSDAVPRLVKLLQMDPEIIVPALRSVGNIVTGTDDQQTDDVVIASGGLPRLGLLQ  
NKSNIKAAWTVSNITAGNQKQIQAVIQAGIFQQLRTVLEKGDFAKQKAAWAVTNTTSGTPEQIVDLIEKYILKPFIDLLDTPRTIKVVT  
GLSNLFALAEKLGNNLCLMVEEMGGLDKLETLQQHENEVYKAYAIIDTYFSGDDEAEQELAPQEVNGALEFNATQPAPEGGYTF

>*D.m.*/Importin  $\alpha$ 3

--

MSMEKNKGKDQDEMRRRRENEVTVELRKNKREETILKRRNVPLDTEEEQLSSIDLKKLAKAAADATKPEQQLAAVQAARKLLSSDKNPPIN  
DLIQSDILPILVECLKQHNHTMLQFEAAWALTNIASGTSQNTNEVVAAGAVPLFLQLLNSPAPNVCEQAVWALGNIIGDGPLLRDFVIKHGVVQ  
PLLSFIKPDIPITFLRNVTWVIVNLCRNKDPAPPTATIHELPAVNLVLIHTDNTLVDTVWVWISYLTGGNDQIQMVIESGVVPLIPLLNSEVKV  
QTAALRAVGNIVTGSDEQTVVNLNYDALSYPGLLSHPKEKIRKEAVWFLSNITAGNQSQVQAVINVGLLPKIENLSKGEFQTQKEAAWALS  
TISGNREQVFTLIKEGVIPFCDLLSCQDTQVINVLDGLNMLKVADSHVEAVANCIECEGLAKIERLQSHENVEIYKLAYEIIDQYFTEGEQTN  
MAPTSD-GAQ-YNFDPHADLTMNSFN

>*M.m.*/Karyopherin  $\alpha$ 1

MSTGKEKNKSLNPDEMRRRREEGLQLRKQKREEQLFKRRNVATAEEVMSDGFENNTSDMTDMIFSNSPEQQLSATQKFRKLLSKEPNP  
PIDEVINTGVVARFVEFLKRKENTLQFESAWVLTNIASGNSLQTRNVIQAGAVPIFIELLSSEFEDVQEAVWALGNIAGDSTMCRDYLNCNI  
LPLLQLFSKQNRMTNRNAVWALSNLCRKGKSPPEFAKVSPLNVLVSWLLFVSDTDVLADACWALSYSYLDGPNDKIQAVIDAGVCRRLVELL  
MHNDYKVVSPALRAVGNIVTGGDIQTQVILNCSALQSLHLLSPPKESIKKACWTISNITAGNRAIQTVIDANMFPALISILQTAEFRTKEAA  
WAITNATSGGSAEQIKYLVELGCIKPLCDLLTVMADAKIVQVALNGLENILRGEQEAQPYCALIEEAYGLDKIEFLQSHENQEIYQKAFDLIEHYF  
EDEDSSIAPQVDSLQQQYIFQQCE-APMEGFQL

>*M.m.*/Importin  $\alpha$ 2

MATKAPKYRGKEMSLPRQQRIASSLQLRKRKDEQVLKRRNIDLFSDMVSQLVKEVNFDDIIVQAVNSSDPILHFRATRAAREMISQENTPPL  
NLIIEAGLIPKLVDFLKATPHPKLQFEAAWVLTNIASGTSQTRAVVKEGAIQPLIELLCSPLTVSEQAVWALGNIAGDCAEFDRCVISNNAIPHL  
INLISKGIPITFLRNISWTLNLCRNKDPYPSESAVRQMLPPLCQLLHRDNEILADTCWALSYLTKGGKEYIHHVVTTGILPRLVELMTSSELSISIP

CLHTIGNIVAGTDEQTM AIDAGMLKVLGQVLKHPKTSIQVLAAWTMSNVAAGPRHQVEQLLCN-  
LLPILVDLLRNAELKVQKEVVCTVINIATGASQDQLTLLAHS GILEPMLSLLSAPDLEVVIIVLDIISYLLQHIDNLQERLYFQIEKFGGFEKIECLQHH  
HNISISNSALDIIKEYFC-DGDGDSLPGPLRV-----

>M.m./Karyopherin  $\alpha$ 3

AENGLKKNKGRDVETMRRHRNEVTVELRKNKRDEHLLKRRNVPQEEDSDVDADFKAQNVLEAILQ NATSDNPVVQLSAVQAARKLLSSDRN  
PPIDDLIKSGILPILVKCLERDDNPSLQFEAAWALTN IASGTS AQTVQAVVQSNVPLFLRLLHSPHQNVCEQAVWALGNIIGDGPQCRDYVISLG  
VVKPILLSFINPSIPITFLRNVTWVIVNLCRNKDPPPPMETVQEILPALCVLIYHTDINILVDTVWALS YLTDGGNEQIQMVIDSGVVPFLVPLLSHQ  
EVKVQTAALRAVGNIVTGTDEQTVVLNCDVLSHFPNLLSHPKEKINKEAVWFLSNITAGNQQVQAVIDAGLIPMIIHQLAKGDFGTQKEAA  
WAINLTSGRKDKQVEYLVQQNVIPFCNLLSVKDSQVVQVVDLGLKNILMAGDEASTIAEIIIECGGLEKIEVLQQHENEDIYKLA FEIIDQYFSI  
DEDPSLIPEAT-QGGTYNFDPTANLQTKEFNF

>M.m./Karyopherin  $\alpha$ 4

ADNKLDKNKGRDLETMRRQRNEVVVELRKNKRDEHLLKRRNVPQEEDSDIDGDYRVQNTLEAIVQNASSDNQGIQLSAVQAARKLLSSDRN  
PPIDDLIKSGILPILVHCLERDDNPSLQFEAAWALTN IASGTSEQTVQAVVQSNVPLFLRLLHSPHQNVCEQAVWALGNIIGDGPQCRDYVISLG  
VVKPILLSFISIPITFLRNVTWVMVNLCRHKDPPPPMETIQEILPALCVLIHHTDVNIVLDTVWALS YLTDAGNEQIQMVIDSGVPHLVPLLSH  
QEVKVQTAALRAVGNIVTGTDEQTVVLNCDALSHFPALLTHPKKINKEAVWFLSNITAGNQQVQAVIDANLVP MIIHLLDKGDFGTQKE  
AAWAINLTSGRKDKQVAYLIQQNVIPFCNLLTVKDAQVQVVDLGLSNILKMAEDQAETIANLIEECGGLEKIEQLQNHENEDIYKLAYEIIDQ  
FFSIDEDPSLVPESV-QGGTFGFNSSTNVPTGEGFQF

>M.m./Karyopherin  $\alpha$ 2

MSTENAKNKGKDSTEMRRRRIEVNVELRKAKKDEQMLKRRNVSSFPPLQENNNQGTVNWVEDIVKGINSNL ESQLOATQAARKLLSREKQ  
PPIDNIIIRAGLIPKFVSLGKTDCSIQFESAWALTN IASGTSEQTKAVVDGGAIPAFISLLASPHAHISEQAVWALGNIAGDGS AFRDLVIKHGAI  
DPLLALLAVPLACGYLRNLTWLNSLNRKNKPAPPLDAVEQILPTLVRLLHNDPEVLADSCWALS YLTDGPNRIEMVVVKGVVPLV KLLGA  
TELPVITPALRAIGNIVTGTDEQTKVIDAGALAVFSP LLTNPKTNIQKEATWTMSNITAGRQDQIQVNVHGLVPFLVGVLSKADFKTQKEAA  
WAITNYTSGGTVEQIVLVHCGIIEPLMNLLSAKDTKIIQVILDAISNIFQAAEKLGEKLSIMIEECGGLDKIEALQRHENESVYKASLN LIEKYFSEEE  
DQNVVPETTSEGFQVQDGAP---GTFNF

>M.m./Karyopherin  $\alpha$ 6

MASGDKNNALNPEEMRRRREEEGQLRKQKREQQLFKRRNVELINEAAMFDLLDSVSSTREMVEMLFSDSDQLLATTQKFRKLLSKEPSP  
IDEVINTGVVDRFVEFLKRNENCTLQFEAAWALTN IASGTSQTKVIEAGAVPIFIRLLSSQYEDVQEAVWALGNIAGDSSLCRDYV LNC SILN  
PLLTLLTKSTRLTMRNAVWALS NLCRGKNPPPEFAKVS PCLPVLSRLLFSSDSDLLADACWALS YLSDGPNKIQAVIDSGVCRRLVELLMHND  
YKVASPALRAVGNIVTGGDIQTQVILNCSALPCLLHLLSSSKESIRKEACWTISNITAGNRAQIQAVIDANIFPV LIEILQKAEFRTRKEAAWAITNA  
TSGGTPEQIRYLVSLGCIKPLCDLLTVMDSKIVQVALNGL ENILRLGEQESKPYCGLIEEAYGLDKIEFLQSHENQEIYQKAFDLIEHYFGEDDSSL  
APQVDETQQQFIFQQPE-APMEGFQL

>T.c./Importin  $\alpha$ 1

MSGAHKNAALDSVELRRRREEEGLQRKQKREQQLNKRRNVNVNQN DLQDSILSPVSPTPEMVQALYSPDVEQQISATQKFRQLLSYEPNP  
PIDEVVQTGIIPRFVFLQNSNNSLQFEAAWALTN VASGTSQQTRMVEAGAVPIFIRLLSSQYEDVQEAVWALGNIAGD SPECRDHVLDS  
GILVPLLQLLSKSTRLSMTRNAVWALS NLCRGKNPPPEFAKVS PALPVLARLLFHSDPDVLS DTCWALS YLSDGPNKIQAVIDAGVCRKLV ELL  
MHQQPNVVS AALRAVGNIVTGGDVQTQVILNCSALHCLHLLSSSKESVRKEACWTISNITAGNRQQIQAVIDANIFPV LIEILSKAEFKTRKEA  
AWAITNATSGGTPDQIRYLVNQACIGPLCDLLTVM DAKIVQVALNGL ENILRLGEQDAKPYAVLIEQCYGLDKIEFLQSHVNMEIYQKAFDIEH  
FFGEEEDTTVAPSVNPDQQQYHFSSDQSVPMGGFHF

>T.c./Importin  $\alpha$ 2

--  
MDENKKNKGKDCCEMRRRRRAGQTIELRKAKKEDQLLKRRNISLQEP LQENNSVSLITMAEEIILMGMMSPDENLQFKATQACRKM LSRERNPPI  
DHMIRLGVVPRCFEFLGKTHNPSLVFEACWALTN IASGTSEQTAAVVQEGALPKLQQLSSNRIDVVEQAIWAIGNIAGDGPESRDVLVNYGVL  
PSLINLIKPNNTLSLLRNTVWVISNLCRNKNPYPDFELVKPALPV LARLLSHDDKDVLDATCWALS YLTDGSNEKIQAVLDTGLIDRLVMLLYSEES  
TVLTPALRAVGNIVTGNHDQTMVINAGALDCMIRLLQHSRLNIVKEAAWTVSNITAGNSEQIQKVL DAGILPYLLHVLQTGDFKSQKEA AWA  
VTNFTSGGNSAQLAQLVEMGALKPMC NLLNSKDSKTIIVLEGLNILLSAAAKLNQKVAIMIEECGGLDGIEALQSHDNEK VYERALHIIENYFA  
GEEGTVTVANGEIQFATPNMADQQSP---FSF

>T.c./Importin  $\alpha$ 3

GQVGINKNKGDQDEMRRRNEVTVELRKNKREETLQKRRNVPVVEDDIEKSLSTTNLEELVAQAAAIDNPPLQLMAIQTARKLLSSDRNPP  
 IDALISSGILPVLVMCLERYDEPSLQFEAAWALTNIASGTSAQTNRVVQAGAVPLFLKLLHSPQQNVCEQAVWALGNIIGDGPQLRQDYVIELGV  
 VNPLLSFIKPDVPISEFLRNVTWVIVNLCRNKDPPIPIQTIRELLPALNALIHHTDTNILVDTVWALSYLTDGGNEQIQMVIDSGVVPKLIPLLSHKE  
 VKVQTAALRAVGNIVTGTDEQTQVVLNCDALSHFPALLSHSKEKICKEAVWFLSNITAGNQMQVQAVIDAGLLPNIINNLKSGDFQTQKEAA  
 WAISNLTIGGNKEQVATLIREGVIPPFCDLLSCKDAQVIQVVLGGINMLKMAGAEVDQLCTMIEECNGLDKIEMLQNHNDNIEIYKIAYDIEEQY  
 FSADDDANLAPTA-ETG-FQFDPNTNVPNEGFKF

#### D) Cuticle defects after *Tc-importin $\alpha$ 1a* RNAi in *black* female pupae mated to *pig19* males

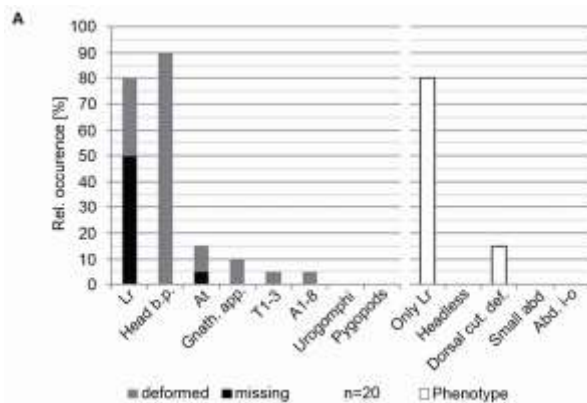

The *Tc-importin  $\alpha$ 1a* fragment was used for RNAi (1  $\mu$ g/ $\mu$ l) in the strain combination, which was used in the iBeetle screen. This resulted in 80.0% with exclusive labrum defects which are either marked by a complete loss (Fig 2I, J) or deformation (Fig 2H) of the labrum. The next most frequently affected structure is the antenna, which shows defects in 15% of all cuticles. *Lr* labrum, *Head b.p.* Head bristle pattern, *At* antennae, *Gnath. app.* gnathal appendages, *T1-3* thoracic segment 1-3, *A1-8* abdominal segments 1-8, *Dorsal cl.* dorsal closure, *Abd. i-o* abdominal segments.

E) Tables summarizing the defects found in the *Tc-importin α1* RNAi experiments

Cuticle defects after injection of *Tc-importin α1a* dsRNA (1 µg/µl) in *black* female pupae which were crossed to *pig19* males.

|              |               |
|--------------|---------------|
| ID           | impα1a Blxpig |
| dsRNA[µg/µl] | 1             |
| n            | 21            |
| wt           | 1             |
| pt           | 20            |
| % affected   | 95.2          |

|            | Lr   | Head b.p. | At   | Gnath. app. | T1-3 | A1-8 | Urogomphi | Pygopods |
|------------|------|-----------|------|-------------|------|------|-----------|----------|
| missing    | 10   | 0         | 1    | 0           | 0    | 0    | 0         | 0        |
| deformed   | 6    | 18        | 2    | 2           | 1    | 1    | 0         | 0        |
| Σ          | 16   | 18        | 3    | 2           | 1    | 1    | 0         | 0        |
| % Σ        | 80.0 | 90.0      | 15.0 | 10.0        | 5.0  | 5.0  | 0         | 0        |
| % missing  | 50.0 | 0         | 5.0  | 0           | 0    | 0    | 0         | 0        |
| % deformed | 30.0 | 90.0      | 10.0 | 10.0        | 5.0  | 5.0  | 0         | 0        |

|   | Only Lr | Headless | Dorsal closure | Small abd | Abd i-o |
|---|---------|----------|----------------|-----------|---------|
| n | 16      | 0        | 3              | 0         | 0       |
| % | 80.0    | 0        | 15.0           | 0         | 0       |

Cuticle defects after injection of *Tc-importin α1a* dsRNA (1 µg/µl) in *SB* female pupae which were crossed to *SB* males.

|              |              |
|--------------|--------------|
| ID           | impα1a SBxSB |
| dsRNA[µg/µl] | 1            |
| n            | 30           |
| wt           | 0            |
| pt           | 30           |
| % affected   | 100          |

|            | Lr   | Head b.p. | At   | Gnath. app. | T1-3 | A1-8 | Urogomphi | Pygopods |
|------------|------|-----------|------|-------------|------|------|-----------|----------|
| missing    | 4    | 4         | 8    | 12          | 5    | 17   | 15        | 15       |
| deformed   | 10   | 19        | 4    | 8           | 18   | 11   | 3         | 5        |
| Σ          | 14   | 23        | 12   | 20          | 23   | 28   | 18        | 20       |
| % Σ        | 46.7 | 76.7      | 40.0 | 66.7        | 76.7 | 93.3 | 60.0      | 66.7     |
| % missing  | 13.3 | 13.3      | 26.7 | 40.0        | 16.7 | 56.7 | 50.0      | 50.0     |
| % deformed | 33.3 | 63.3      | 13.3 | 26.7        | 60.0 | 36.7 | 10.0      | 16.7     |

|   | Only Lr | Headless | Dorsal closure | Small abd | Abd i-o |
|---|---------|----------|----------------|-----------|---------|
| n | 0       | 4        | 7              | 4         | 11      |
| % | 0       | 13.3     | 23.3           | 13.3      | 36.6    |

Cuticle defects after injection of *Tc-importin α1b* dsRNA (1 µg/µl) in *SB* female pupae which were crossed to *SB* males.

|                          |                       |
|--------------------------|-----------------------|
| ID                       | imp $\alpha$ 1b SBxSB |
| dsRNA[ $\mu$ g/ $\mu$ l] | 1                     |
| n                        | 13                    |
| wt                       | 0                     |
| pt                       | 13                    |
| % affected               | 100                   |

|            | Lr   | Head b.p. | At   | Gnath. app. | T1-3 | A1-8  | Urogomphi | Pygopods |
|------------|------|-----------|------|-------------|------|-------|-----------|----------|
| missing    | 0    | 0         | 1    | 0           | 1    | 9     | 8         | 8        |
| deformed   | 3    | 9         | 3    | 4           | 7    | 4     | 0         | 0        |
| $\Sigma$   | 3    | 9         | 4    | 4           | 8    | 13    | 8         | 8        |
| % $\Sigma$ | 23.1 | 69.2      | 30.8 | 30.8        | 61.5 | 100.0 | 61.5      | 61.5     |
| % missing  | 0    | 0         | 7.7  | 0           | 7.7  | 69.2  | 61.5      | 61.5     |
| % deformed | 23.1 | 69.2      | 23.1 | 30.8        | 53.8 | 30.8  | 0         | 0        |

|   | Onyl Lr | Headless | Dorsal closure | Small abd | Abd i-o |
|---|---------|----------|----------------|-----------|---------|
| n | 0       | 0        | 3              | 2         | 6       |
| % | 0       | 0        | 23.1           | 15.4      | 46.2    |

Cuticle defects after injection of *Tc-importin  $\alpha$ 1a* dsRNA (1  $\mu$ g/ $\mu$ l) in *black* female pupae which were crossed to *pBa19* males.

|                          |                       |
|--------------------------|-----------------------|
| ID                       | imp $\alpha$ 1a BlxBl |
| dsRNA[ $\mu$ g/ $\mu$ l] | 1                     |
| n                        | 26                    |
| wt                       | 4                     |
| pt                       | 22                    |
| % affected               | 84.6                  |

|            | Lr   | Head b.p. | At   | Gnath. app. | T1-3 | A1-8 | Urogomphi | Pygopods |
|------------|------|-----------|------|-------------|------|------|-----------|----------|
| missing    | 11   | 0         | 2    | 1           | 0    | 1    | 1         | 1        |
| deformed   | 8    | 17        | 3    | 4           | 0    | 0    | 0         | 0        |
| $\Sigma$   | 19   | 17        | 5    | 5           | 0    | 1    | 1         | 1        |
| % $\Sigma$ | 86.4 | 77.3      | 22.7 | 22.7        | 0    | 4.5  | 4.5       | 4.5      |
| % missing  | 50.0 | 0         | 9.1  | 4.5         | 0    | 4.5  | 4.5       | 4.5      |
| % deformed | 36.4 | 77.3      | 13.6 | 18.2        | 0    | 0    | 0         | 0        |

|   | Only Lr | Headless | Dorsal closure | Small abd | Abd i-o |
|---|---------|----------|----------------|-----------|---------|
| n | 14      | 0        | 0              | 0         | 1       |
| % | 63.6    | 0        | 0              | 0         | 4.5     |

Cuticle defects after injection of *Tc-importin α1b* dsRNA (1 µg/µl) in *black* female pupae which were crossed to *black* males.

|              |              |
|--------------|--------------|
| ID           | impα1b BlxBI |
| dsRNA[µg/µl] | 1            |
| n            | 9            |
| wt           | 2            |
| pt           | 7            |
| % affected   | 77.8         |

|            | Lr   | Head b.p. | At   | Gnath. app. | T1-3 | A1-8 | Urogomphi | Pygopods |
|------------|------|-----------|------|-------------|------|------|-----------|----------|
| missing    | 3    | 0         | 0    | 0           | 0    | 0    | 0         | 0        |
| deformed   | 3    | 5         | 2    | 1           | 0    | 0    | 0         | 0        |
| Σ          | 6    | 5         | 2    | 1           | 0    | 0    | 0         | 0        |
| % Σ        | 85.7 | 71.4      | 28.6 | 14.3        | 0    | 0    | 0         | 0        |
| % missing  | 42.9 | 0         | 0    | 0           | 0    | 0    | 0         | 0        |
| % deformed | 42.9 | 71.4      | 28.6 | 14.3        | 0    | 0    | 0         | 0        |

|   | Only Lr | Headless | Dorsal closure | Small abd | Abd i-o |
|---|---------|----------|----------------|-----------|---------|
| n | 4       | 0        | 2              | 0         | 0       |
| % | 57.1    | 0        | 28.6           | 0         | 0       |

Cuticle defects after injection of *Tc-importin α1a* dsRNA (0.3 µg/µl) in *SB* female pupae which were crossed to *SB* males.

|               |              |
|---------------|--------------|
| ID            | impα1a SBxSB |
| dsRNA[ µg/µl] | 0.3          |
| n             | 18           |
| wt            | 2            |
| pt            | 16           |
| % affected    | 88.9         |

|            | Lr   | Head b.p. | At | Gnath. app. | T1-3 | A1-8 | Urogomphi | Pygopods |
|------------|------|-----------|----|-------------|------|------|-----------|----------|
| missing    | 0    | 0         | 0  | 1           | 0    | 8    | 8         | 8        |
| deformed   | 2    | 13        | 0  | 1           | 4    | 5    | 0         | 0        |
| Σ          | 2    | 13        | 0  | 2           | 4    | 13   | 8         | 8        |
| % Σ        | 12.5 | 81.3      | 0  | 12.5        | 25.0 | 81.3 | 50.0      | 50.0     |
| % missing  | 0    | 0         | 0  | 6.3         | 0    | 50.0 | 50.0      | 50.0     |
| % deformed | 12.5 | 81.3      | 0  | 6.3         | 25.0 | 31.3 | 0         | 0        |

|   | Onyl Lr | Headless | Dorsal closure | Small abd | Abd i-o |
|---|---------|----------|----------------|-----------|---------|
| n | 0       | 0        | 1              | 0         | 8       |
| % | 0       | 0        | 6.3            | 0         | 50.0    |

Cuticle defects after injection of *Tc-importin α1a* dsRNA (0.3 μg/μl) in *black* female pupae which were crossed to *black* males.

|              |              |
|--------------|--------------|
| ID           | impα1a BlxB1 |
| dsRNA[μg/μl] | 0.3          |
| n            | 18           |
| wt           | 1            |
| pt           | 17           |
| % affected   | 94.4         |

|            | Lr   | Head b.p. | At   | Gnath. app. | T1-3 | A1-8 | Urogomphi | Pygopods |
|------------|------|-----------|------|-------------|------|------|-----------|----------|
| missing    | 7    | 0         | 1    | 0           | 0    | 0    | 0         | 0        |
| deformed   | 7    | 14        | 1    | 0           | 3    | 3    | 0         | 0        |
| Σ          | 14   | 14        | 2    | 0           | 3    | 3    | 0         | 0        |
| % Σ        | 82.4 | 82.4      | 11.8 | 0           | 17.6 | 17.6 | 0         | 0        |
| % missing  | 41.2 | 0         | 5.9  | 0           | 0    | 0    | 0         | 0        |
| % deformed | 41.2 | 82.4      | 5.9  | 0           | 17.6 | 17.6 | 0         | 0        |

|   | Only Lr | Headless | Dorsal closure | Small abd | Abd i-o |
|---|---------|----------|----------------|-----------|---------|
| n | 14      | 0        | 2              | 0         | 0       |
| % | 82.4    | 0        | 11.8           | 0         | 0       |

Cuticle defects after injection of *Tc-importin α1a* dsRNA (3 μg/μl) in *black* female pupae which were crossed to *black* males.

|              |              |
|--------------|--------------|
| ID           | impα1a BlxB1 |
| dsRNA[μg/μl] | 3            |
| n            | 20           |
| wt           | 0            |
| pt           | 20           |
| % affected   | 100          |

|            | Lr   | Head b.p. | At   | Gnath. app. | T1-3 | A1-8 | Urogomphi | Pygopods |
|------------|------|-----------|------|-------------|------|------|-----------|----------|
| missing    | 8    | 0         | 2    | 4           | 0    | 2    | 2         | 2        |
| deformed   | 4    | 19        | 4    | 3           | 1    | 1    | 0         | 0        |
| Σ          | 12   | 19        | 6    | 7           | 1    | 3    | 2         | 2        |
| % Σ        | 60.0 | 95.0      | 30.0 | 35.0        | 5.0  | 15.0 | 10.0      | 10.0     |
| % missing  | 40.0 | 0         | 10.0 | 20.0        | 0    | 10.0 | 10.0      | 10.0     |
| % deformed | 20.0 | 95.0      | 20.0 | 15.0        | 5.0  | 5.0  | 0         | 0        |

|   | Only Lr | Headless | Dorsal closure | Small abd | Abd i-o |
|---|---------|----------|----------------|-----------|---------|
| n | 6       | 0        | 3              | 0         | 1       |
| % | 30.0    | 0        | 15.0           | 0         | 5.0     |



Cuticle defects after injection of *Tc-importin α1a* dsRNA (1 µg/µl) in SB female pupae which were crossed to *black* males.

|              |              |
|--------------|--------------|
| ID           | impα1a SBxBI |
| dsRNA[µg/µl] | 1            |
| n            | 25           |
| wt           | 2            |
| pt           | 23           |
| % affected   | 92.0         |

|            | Lr   | Head b.p. | At   | Gnath. app. | T1-3 | A1-8 | Urogomphi | Pygopods |
|------------|------|-----------|------|-------------|------|------|-----------|----------|
| missing    | 2    | 2         | 4    | 4           | 2    | 13   | 13        | 13       |
| deformed   | 4    | 13        | 2    | 2           | 9    | 1    | 0         | 0        |
| Σ          | 6    | 15        | 6    | 6           | 11   | 14   | 13        | 13       |
| % Σ        | 26.1 | 65.2      | 26.1 | 26.1        | 47.8 | 60.9 | 56.5      | 56.5     |
| % missing  | 8.7  | 8.7       | 17.4 | 17.4        | 8.7  | 56.5 | 56.5      | 56.5     |
| % deformed | 17.4 | 56.5      | 8.7  | 8.7         | 39.1 | 4.3  | 0         | 0        |

|   | Only Lr | Headless | Dorsal closure | Small abd | Abd i-o |
|---|---------|----------|----------------|-----------|---------|
| n | 1       | 2        | 4              | 3         | 10      |
| % | 4.3     | 8.7      | 17.4           | 13.0      | 43.5    |

Cuticle defects after injection of *Tc-importin α1a* dsRNA (1 µg/µl) in *black* female pupae which were crossed to SB males.

|              |              |
|--------------|--------------|
| ID           | impα1a BlxSB |
| dsRNA[µg/µl] | 1            |
| n            | 27           |
| wt           | 3            |
| pt           | 24           |
| % affected   | 88.9         |

|            | Lr   | Head b.p. | At   | Gnath. app. | T1-3 | A1-8 | Urogomphi | Pygopods |
|------------|------|-----------|------|-------------|------|------|-----------|----------|
| missing    | 12   | 1         | 3    | 1           | 0    | 2    | 3         | 3        |
| deformed   | 7    | 20        | 2    | 3           | 2    | 2    | 0         | 0        |
| Σ          | 19   | 21        | 5    | 4           | 2    | 4    | 3         | 3        |
| % Σ        | 79.2 | 87.5      | 20.8 | 16.7        | 8.3  | 16.7 | 12.5      | 12.5     |
| % missing  | 50.0 | 4.2       | 12.5 | 4.2         | 0    | 8.3  | 12.5      | 12.5     |
| % deformed | 29.2 | 83.3      | 8.3  | 12.5        | 8.3  | 8.3  | 0         | 0        |

|   | Only Lr | Headless | Dorsal closure | Small abd | Abd i-o |
|---|---------|----------|----------------|-----------|---------|
| n | 12      | 0        | 2              | 1         | 0       |
| % | 50.0    | 0        | 8.3            | 4.2       | 0       |

**F) Tables summarizing the defects found in the other RNAi experiments**

**Quantification of cuticle phenotypes after *Tc-dll* RNAi in *black* female pupae crossed to *black* males.**

|                                    |                     |
|------------------------------------|---------------------|
| ID                                 | <i>Tc-dll</i> BlxBI |
| dsRNA[ $\mu\text{g}/\mu\text{l}$ ] | 1                   |
| n                                  | 50                  |

| Phenotype | Level 4 | Level 3 | Level 2 | Level 1 |
|-----------|---------|---------|---------|---------|
| $\Sigma$  | 6       | 16      | 21      | 7       |
| %         | 12      | 32      | 42      | 14      |

**Quantification of cuticle phenotypes after *Tc-dll* RNAi in *SB* female pupae crossed to *SB* males.**

|                                    |                     |
|------------------------------------|---------------------|
| ID                                 | <i>Tc-dll</i> SBxSB |
| dsRNA[ $\mu\text{g}/\mu\text{l}$ ] | 1                   |
| n                                  | 50                  |

| Phenotype | Level 4 | Level 3 | Level 2 | Level 1 |
|-----------|---------|---------|---------|---------|
| $\Sigma$  | 0       | 14      | 33      | 3       |
| %         | 0       | 28      | 66      | 6       |

**Quantification of cuticle phenotypes after *Tc-gt* RNAi in *SB* female pupae crossed to *SB* males.**

|                                    |                    |
|------------------------------------|--------------------|
| ID                                 | <i>Tc-gt</i> SBxSB |
| dsRNA[ $\mu\text{g}/\mu\text{l}$ ] | 1                  |
| n                                  | 50                 |

| Del. segm. n | 0 | 0.5 | 1 | 1.5 | 2  | 2.5 | 3  | 3.5 | 4 | 4.5 | 5 | 5.5 | 6 | 6.5 | 7 |
|--------------|---|-----|---|-----|----|-----|----|-----|---|-----|---|-----|---|-----|---|
| $\Sigma$     | 1 | 4   | 3 | 9   | 7  | 11  | 5  | 4   | 3 | 2   | 0 | 0   | 1 | 0   | 0 |
| %            | 2 | 8   | 6 | 18  | 14 | 22  | 10 | 8   | 6 | 4   | 0 | 0   | 2 | 0   | 0 |

**Quantification of cuticle phenotypes after *Tc-gt* RNAi in *black* female pupae crossed to *black* males.**

|                                    |                    |
|------------------------------------|--------------------|
| ID                                 | <i>Tc-gt</i> BlxBI |
| dsRNA[ $\mu\text{g}/\mu\text{l}$ ] | 1                  |
| n                                  | 50                 |

| Del. segm. n | 0 | 0.5 | 1  | 1.5 | 2  | 2.5 | 3  | 3.5 | 4 | 4.5 | 5 | 5.5 | 6 | 6.5 | 7 |
|--------------|---|-----|----|-----|----|-----|----|-----|---|-----|---|-----|---|-----|---|
| $\Sigma$     | 0 | 1   | 6  | 6   | 11 | 10  | 8  | 7   | 1 | 0   | 0 | 0   | 0 | 0   | 0 |
| %            | 0 | 2   | 12 | 12  | 22 | 20  | 16 | 14  | 2 | 0   | 0 | 0   | 0 | 0   | 0 |

**Quantification of pupal phenotypes after *Tc-wg* RNAi in *SB* females.**

|                                    |                 |
|------------------------------------|-----------------|
| ID                                 | <i>Tc-wg</i> SB |
| dsRNA[ $\mu\text{g}/\mu\text{l}$ ] | 1               |
| n                                  | 10              |

| Phenotype      | Level 4   | Level 3   | Level 2   | Level 1 |
|----------------|-----------|-----------|-----------|---------|
| Mx $\phi$ [in] | 0,16-0,21 | 0,22-0,27 | 0,28-0,33 | >0,33   |
| $\Sigma$       | 5         | 1         | 1         | 3       |
| %              | 45.5      | 9.1       | 9.1       | 27.3    |

### Quantification of pupal phenotypes after *Tc-wg* IRNAi in *black* females.

|                                    |                 |
|------------------------------------|-----------------|
| ID                                 | <i>Tc-wg</i> Bl |
| dsRNA[ $\mu\text{g}/\mu\text{l}$ ] | 1               |
| n                                  | 12              |

| Phenotype      | Level 4   | Level 3   | Level 2   | Level 1 |
|----------------|-----------|-----------|-----------|---------|
| Mx $\phi$ [in] | 0,16-0,21 | 0,22-0,27 | 0,28-0,33 | >0,33   |
| $\Sigma$       | 3         | 6         | 2         | 1       |
| %              | 25        | 50        | 16.7      | 8.3     |

### Quantification of pupal phenotypes after *Tc-six3* IRNAi in *black* females.

|                                    |                   |
|------------------------------------|-------------------|
| ID                                 | <i>Tc-six3</i> Bl |
| dsRNA[ $\mu\text{g}/\mu\text{l}$ ] | 0.5               |
| n                                  | 10                |

| Phenotype                    | Level 4 | Level 3   | Level 2   | Level 1 |
|------------------------------|---------|-----------|-----------|---------|
| Eye field [in <sup>2</sup> ] | <0.16   | 0.17-0.23 | 0.24-0.30 | >0.31   |
| $\Sigma$                     | 3       | 4         | 1         | 2       |
| %                            | 30      | 40        | 10        | 20      |

### Quantification of pupal phenotypes after *Tc-six3* IRNAi in *SB* females.

|                                    |                   |
|------------------------------------|-------------------|
| ID                                 | <i>Tc-six3</i> SB |
| dsRNA[ $\mu\text{g}/\mu\text{l}$ ] | 0.5               |
| n                                  | 11                |

| Phenotype                    | Level 4 | Level 3   | Level 2   | Level 1 |
|------------------------------|---------|-----------|-----------|---------|
| Eye field [in <sup>2</sup> ] | <0.16   | 0.17-0.23 | 0.24-0.30 | >0.31   |
| $\Sigma$                     | 2       | 8         | 1         | 0       |
| %                            | 18.2    | 72.7      | 9.1       | 0       |

## G) Measurements of maxillary palpus diameter and eyefield

### *SB* wild-type pupae

|           |              |
|-----------|--------------|
| <b>ID</b> | <i>wt SB</i> |
| <b>n</b>  | 10           |

|           | <b>Mx <math>\phi</math> [in]</b> | <b>Eyefield [in<sup>2</sup>]</b> |
|-----------|----------------------------------|----------------------------------|
| <b>1</b>  | 0.35                             | 0.41                             |
| <b>2</b>  | 0.35                             | 0.41                             |
| <b>3</b>  | 0.35                             | 0.43                             |
| <b>4</b>  | 0.33                             | 0.41                             |
| <b>5</b>  | 0.36                             | 0.4                              |
| <b>6</b>  | 0.35                             |                                  |
| <b>7</b>  | 0.36                             |                                  |
| <b>8</b>  | 0.35                             |                                  |
| <b>9</b>  | 0.34                             |                                  |
| <b>10</b> | 0.36                             |                                  |

### *black* wild-type pupae.

|           |                 |
|-----------|-----------------|
| <b>ID</b> | <i>wt black</i> |
| <b>n</b>  | 10              |

|           | <b>Mx <math>\phi</math> [in]</b> | <b>Eyefield [in<sup>2</sup>]</b> |
|-----------|----------------------------------|----------------------------------|
| <b>1</b>  | 0.35                             | 0.46                             |
| <b>2</b>  | 0.35                             | 0.45                             |
| <b>3</b>  | 0.35                             | 0.45                             |
| <b>4</b>  | 0.35                             | 0.46                             |
| <b>5</b>  | 0.37                             | 0.41                             |
| <b>6</b>  | 0.35                             |                                  |
| <b>7</b>  | 0.37                             |                                  |
| <b>8</b>  | 0.35                             |                                  |
| <b>9</b>  | 0.35                             |                                  |
| <b>10</b> | 0.36                             |                                  |

## H) Alignment of *Tc-Importin α1* amino acid sequence in different *Tribolium* strains and metazoans

>*S. cerevisiae* SRP1

MDNGTDSSTSKFVPEYRRTNFKNKGRFSADELRRRRDRTQVELRKAKRDEALAKRRNFIPPTDGADSDEEDESVSADQQFYSQLQQELPQM  
TQQLNSDDMQEQLSATVKFRQILSREHRPPIDVVIQA-  
GVVPRLVFEMRENQPEMLQLEAAWALTNIASGTSAAQTKVVVDADAVPLFIQLLYTGSVEVKEQAIWALGNVAGDSTDYRDYVLQCNAMEPIL  
GLFN-  
SNKPSLIRATWTLNLCRGGKQPDPWSVVSQALPTLAKLIYSMDTETLVDACWAIYSLDGPPQEAIQAVIDVRIPKRLVELLSHESHTLVQTPALR  
AVGNIVTGNLDTQVIVNAGVLPALRLLSSPKENIKKEACWTISNITAGNTEQIQAVIDANLIPPLVKLLEVAEYKTKKEACWAINASSGGLQR  
PDIIRYLVSQGCIKPLCDLLEIADNRRIEVLDALENILKMGGEADKEARGLNINENADFIKAGGMEKIFNCQQNENDKIYKAYKIIETYFGEEEDA  
VDETMAPQNAGNTFGFGSNVN----QQFNFN\_

>*T. castaneum* SB

-----MS-GSAHKHR---YKNAA-LDSVELRRRREEEGLQLRKQKREQQLNKRRNVN--VNQLAEDNDHQLQVDSEILSPVS--  
PMITPEMVQALYSPDVEQQISATQKFRQLLSYEPNPPIDEVVQT-  
GIIPRFVEFLQNSNNCNLQFEAAWALTNVASGTSQQTRMVEIAGAVPIFIRLLSSQYEDVQEQAQVWALGNIAGDSPECRDHVLDSGILVPLLQL  
LSKSTRLSMTRNAVWALSNLCRGKNPPDFAKVSPALPVLARLLFHSDPDVLSBTCWALSYSLDGPNKEIQAVIDAGVCRKLVLLMHQQPNV  
VSAALRAVGNIVTGDDVQTQVILNCSALHCLHLLSSSKESVRKEACWTISNITAGNRLQIQAVIDANIFPVLIEILSKAEFKTRKEAAWAITNATS  
GGT--PDQIRYLVNQACIGPLCDLLTVMDAKIVQVALNGLENILRLGEQDAKN-  
HSGTNPYAVLIEQCYGLDKIEFLQSHVNMEIYQKAFDIEHFFGTEEDTTVAPSVNPDQQQYHFSSDQS--VPMGGFHF\_-

>*T. castaneum* Black

-----MS-GSAHKHR---YKNAA-LDSVELRRRREEEGLQLRKQKREQQLNKRRNVN--VNQLAEDNDHQLQVDSEILSPVS--  
PMITPEMVQALYSPDVEQQISATQKFRQLLSYEPNPPIDEVVQT-  
GIIPRFVEFLQNSNNCSLQFEAAWALTNVASGTSQQTRMVEIAGAVPIFIRLLSSQYEDVQEQAQVWALGNIAGDSPECRDHVLDSGILVPLLQLL  
SKSTRLSMTRNAVWALSNLCRGKNPPDFAKVSPALPVLARLLFHSDPDVLSBTCWALSYSLDGPNKEIQAVIDAGVCRKLVLLMHQQPNV  
SAALRAVGNIVTGDDVQTQVILNCSALHCLHLLSSSKESVRKEACWTISNITAGNRQQIQAVIDANIFPVLIEILSKAEFKTRKEAAWAITNATS  
GGT--PDQIRYLVNQACIGPLCDLLTVMDAKIVQVALNGLENILRLGEQDAKN-  
HSGTNPYAVLIEQCYGLDKIEFLQSHVNMEIYQKAFDIEHFFGTEEDTTVAPSVNPDQQQYHFSSDQS--VPMGGFHF\_-

>*T. castaneum* GA2

-----MS-GSAHKHR---YKNAA-LDSVELRRRREEEGLQLRKQKREQQLNKRRNVN--VNQLAEDNDHQLQVDSEILSPVS--  
PMITPEMVQALYSPDVEQQISATQKFRQLLSYEPNPPIDEVVQT-  
GIIPRFVEFLQNSNNCSLQFEAAWALTNVASGTSQQTRMVEIAGAVPIFIRLLSSQYEDVQEQAQVWALGNIAGDSPECRDHVLDSGILVPLLQLL  
SKSTRLSMTRNAVWALSNLCRGKNPPDFAKVSPALPVLARLLFHSDPDVLSBTCWALSYSLDGPNKEIQAVIDAGVCRKLVLLMHQQPNV  
SAALRAVGNIVTGDDVQTQVILNCSALHCLHLLSSSKESVRKEACWTISNITAGNRQQIQAVIDANIFPVLIEILSKAEFKTRKEAAWAITNATS  
GGT--PDQIRYLVNQACIGPLCDLLTVMDAKIVQVALNGLENILRLGEQDAKN-  
HSGTNPYAVLIEQCYGLDKIEFLQSHVNMEIYQKAFDIEHFFGTEEDTTVAPSVNPDQQQYHFSSDQS--VPMGGFHF\_-

>*M. musculus*

----METMASPGKDNRYMKSYKNNNA-LNPEEMRRRREEEGLQLRKQKREQQLFKRRNVE--  
LINEEAAMFDSLMLDSYVSSTGESVITREMVEMLFSDSDQLLATTQKFRKLLSKEPSPIDEVINTPGVVDRFVFLKRNENCTLQFEAAWAL  
TNIASGTSQQTIVIEAGAVPIFIELLNSDFEDVQEQAQVWALGNIAGDSSLCDYVILNCSILNPLLLTKSTRLTMTRNAVWALSNLCRGKNPP  
EFAKVSPCLPVLRSLLFSSDSLADACWALSYSLDGPNKEIQAVIDSGVCRRLVELLMHNDYKVASPALRAVGNIVTGDDIQTQVILNCSALPCL  
LHLLSSSKESIRKEACWTISNITAGNRAIQAVIDANIFPVLIEILQKAEFRTRKEAAWAITNATSGGT--  
PEQIRYLVSLGCIKPLCDLLTVMDSKIVQVALNGLENILRLGEQESKRSGSVNYPYCGLIEEAYGLDKIEFLQSHENQEIYQKAFDLIEHYFGVEDD  
DSSLAPQVDETTQQFIFQQPEA---PMEGFQL\_-

>*D. melanogaster*

-----VINEEMIQMLFSGRENEQLEATQKFRKLLSRDPNPPIEVIQK-  
GIVPQFVTFRLNSANATLQFEAAWTLTNIASGTSQQTIVIEAGAVPIFIDLLSSPHDDVQEQAQVWALGNIAGDSPMCRDHLLGSGILEPLLHV  
LSNSDRITMIRNAVWTLNLCRGGKPPADFAKISHGLPILARLLKYTDADVLSBTCWAIYGLSDGPNKIQAVIDAGVCRRLVELLHPQQNVST  
AALRAVGNIVTGDDQQTQVILGYNALTCISHLLHSTAETIKKESCWTISNIAAGNREIQALINANIFPQLMVMIMQTAEFKTRKEAAWAITNATS  
SGT--HEQIHYLVQVQCVPPMCDFLTVDSDIVQVALNALENILKAGEKFQTR----  
PNPYAITIEECGLDKIEFLQAHENRDIYHKSFYIIEQYFGNEEDSRVAPVAG--TQQFEFD-PDN--MPSTGFNF\_-

>*A. mellifera*

-----MSAATTHKYR---YKNVG-LDSQELRRRREEEGLQLRKQKREQQLSKRRNVP--NMVADDDNVTGNES-  
AYPAPQSKTSIIVLEMVQELYSNPPEAQLAATQKFRKMLSRPNPPIDEVVKT-  
GIVPKFVEFLENNANCTLQFEAAWALTNIASGTSQQTRVVVDAGAVPIFISLLGSEYEDVQEQAQVWALGNIAGDSPECRDHVLDRGILTPLLQLL  
SKATRLSMTRNAVWALSNLCRGKTPPEFTKVAPCLPVLAFHNLHTSDVLADACWALSYSLDGPNKEIQAVIDAGVCRRLVELLHPQQENV  
VSAALRAVGNIVTGDDVQTQVILNCSALHCLYHLLSSQESIRKEACWTISNITAGNPQQIQAVIDAGIFPVLIDILAKAEFKIRKEAAWAITNATS

GGA--PEQIRYIVVEGCIPPLCNLLTVMDPKIVQVALSGLLENILRVGEQDAAS-  
 HNGINHVAVLIEECFGLNKIEFLQSHQNVEIQKAFDIIERYFGSEEDTRVVPPTIDAQQGQFQFRAPDSSQLPVQGFEF\_-

>*N. vitripennis*

-----MSSGPAHKYR---YKNVG-LDSQELRRRREEEGVQLRKQKREQQLSKRRNVP--  
 NIVTDDGVSITEDYVTPPIMQAPGITQDMVEALYSQDVNEQLTATQKFRKLLSKEPNPPIDEVIQT-  
 GIVPRFVEFLKNDTNTLQFEAAWALTNIASGTSLQTRMVVDAGAVPMFIALLSSEYEDVQEAVWALGNIAGDSPACRDHVLSSGILPPLLVL  
 LSKPARLTMTRNAVWALSNLCRGKEPAPDFQKVAPCLPVLAYLLNHQDADVLADACWALSYSISDGPNEKIQAVIDAGVCRRLVELLMHEQHN  
 VTSAAALRAVGNIIVTGDMMQTVVNLNCSALTCLLHLLGQSRESIRKEACWTVSNITAGNPQQIQAVIDAKIFPVIIDILGKAEFKTRKEAAWAITN  
 ATSGGT--ADQIRYLADQNCIPPLCELLTVMDATIIQVALNGLLENILRLGEQDAVH-  
 HNGVNPYCVLIEQCFLDKIEFLQSHQNLEIQKAFDIIERYFGSEEDSKIAPSVDSQGQFQFPAPDSSQLPVHSFQF\_-

### I) Phenotype of pig19 injected females mated to black males

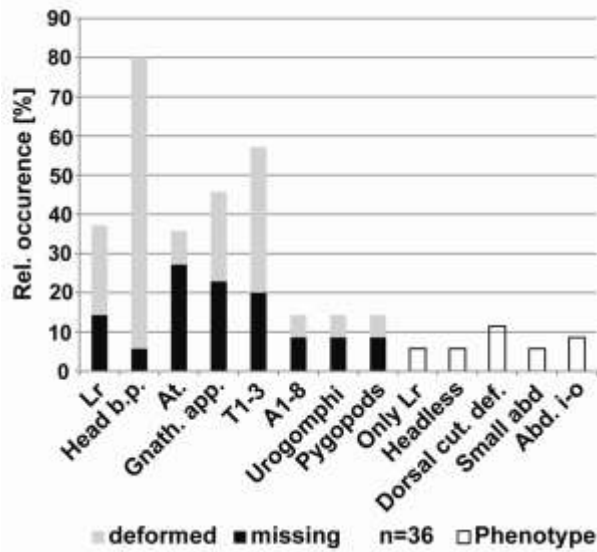

The phenotype of the offspring is an intermediate between black and SB in that “only labrum” phenotypes do occur (6%) but more structures are affected than in black (compare to Fig. A and D)

### J) Effect of *Tc-Importin α1* RNAi on fertility of different strains

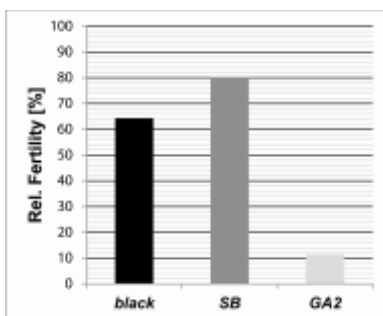

*Tc-dll* (control) and *Tc-importin α1* dsRNA (both 1 μg/μl) were injected into female pupae of *Black*, *SB* and *Georgia-2* and mated to untreated males of the same strain. The eggs laid per female were documented and the *Tc-importin α1* RNAi results were normalized to the control RNAi. *Tc-importin α1* RNAi in the *Black* and *SB* background resulted in a reduction of the egglay of about 20% (*SB*) to 35% (*black*). The egglay of *GA2* was reduced by about 90%.

K) Upregulation of maternal *Tc-importin α2* after *Tc-importin α1* RNAi in the *black* strain

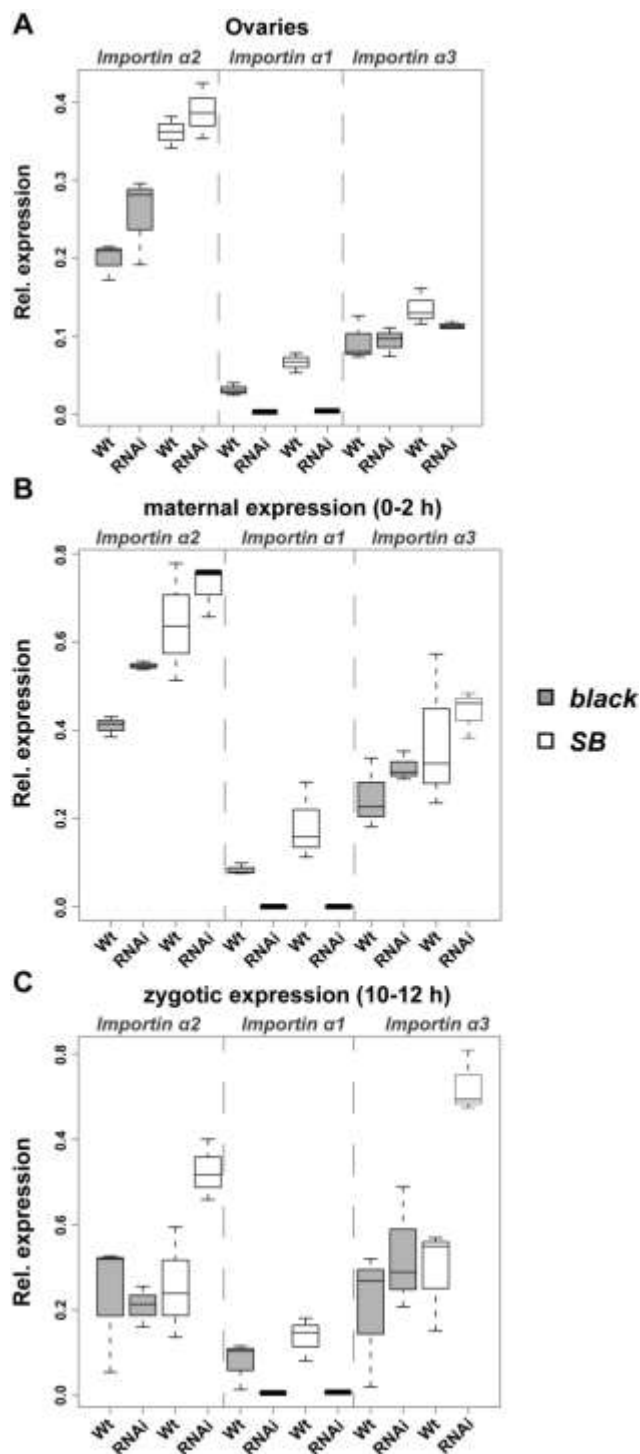

The level of expression was determined by qPCR in ovaries (A), freshly laid eggs (0-2h; maternal message; B) and 10-12 h embryos (zygotic expression; C) in wild-type and in *Tc-importin α1* knockdown animals. Results from the black strain are depicted with grey boxes, SB expression levels are shown as open boxes. wt and RNAi values are shown side by side, respectively. B) In *Tc-importin α1* knockdown embryos, the maternal load of *Tc-importin α2* is strongly elevated in *black* (compare first with second column) but less so in SB. C) Zygotic expression of *Tc-importin α2* and 3 are elevated in SB but less so in *black* (compare fourth with third and 12<sup>th</sup> with 11<sup>th</sup> column). Note that in contrast to figure 8, the values of the two strains were not normalized to each other.
